# Supplementary material
Source: PubMed Central journal article supplement (PMC6467090)
Supplement: NIHMS1523171-supplement-2.pdf [file NIHMS1523171-supplement-2.pdf]

Molly C. Kottemann, Brooke A. Conti, Francis P. Lach, and Agata Smogorzewska

Removal of RTF2 from stalled replisomes promotes maintenance of genome integrity

## **Supplemental Information**

**Figure S1:** DDI1/2 depletion leads to decreased cellular survival after replication stress; related to Figure 1

**Figure S2:** DDI1/2 depletion results in RTF2 stabilization; related to Figure 2

**Figure S3:** Response to replication stress is altered in cells depleted of DDI1/2; related to Figure 3

**Figure S4:** DDI1/2 depletion causes increased chromosomal damage after acute replication stress, related to Figure 4

**Figure S5:** Heightened DNA damage signaling and ssDNA during replication stress under conditions of DDI1/2 depletion, related to Figure 5

**Figure S6:** RTF2 is required for robust RPA phosphorylation in response to replication stress induced by HU; related to Figure 5

**Supplemental Table 1:** RNAi and primer sequences, related to STAR Methods Cell culture, transfection and viral transduction; and RNA preparation, reverse transcription, and real time PCR.

Figure S1

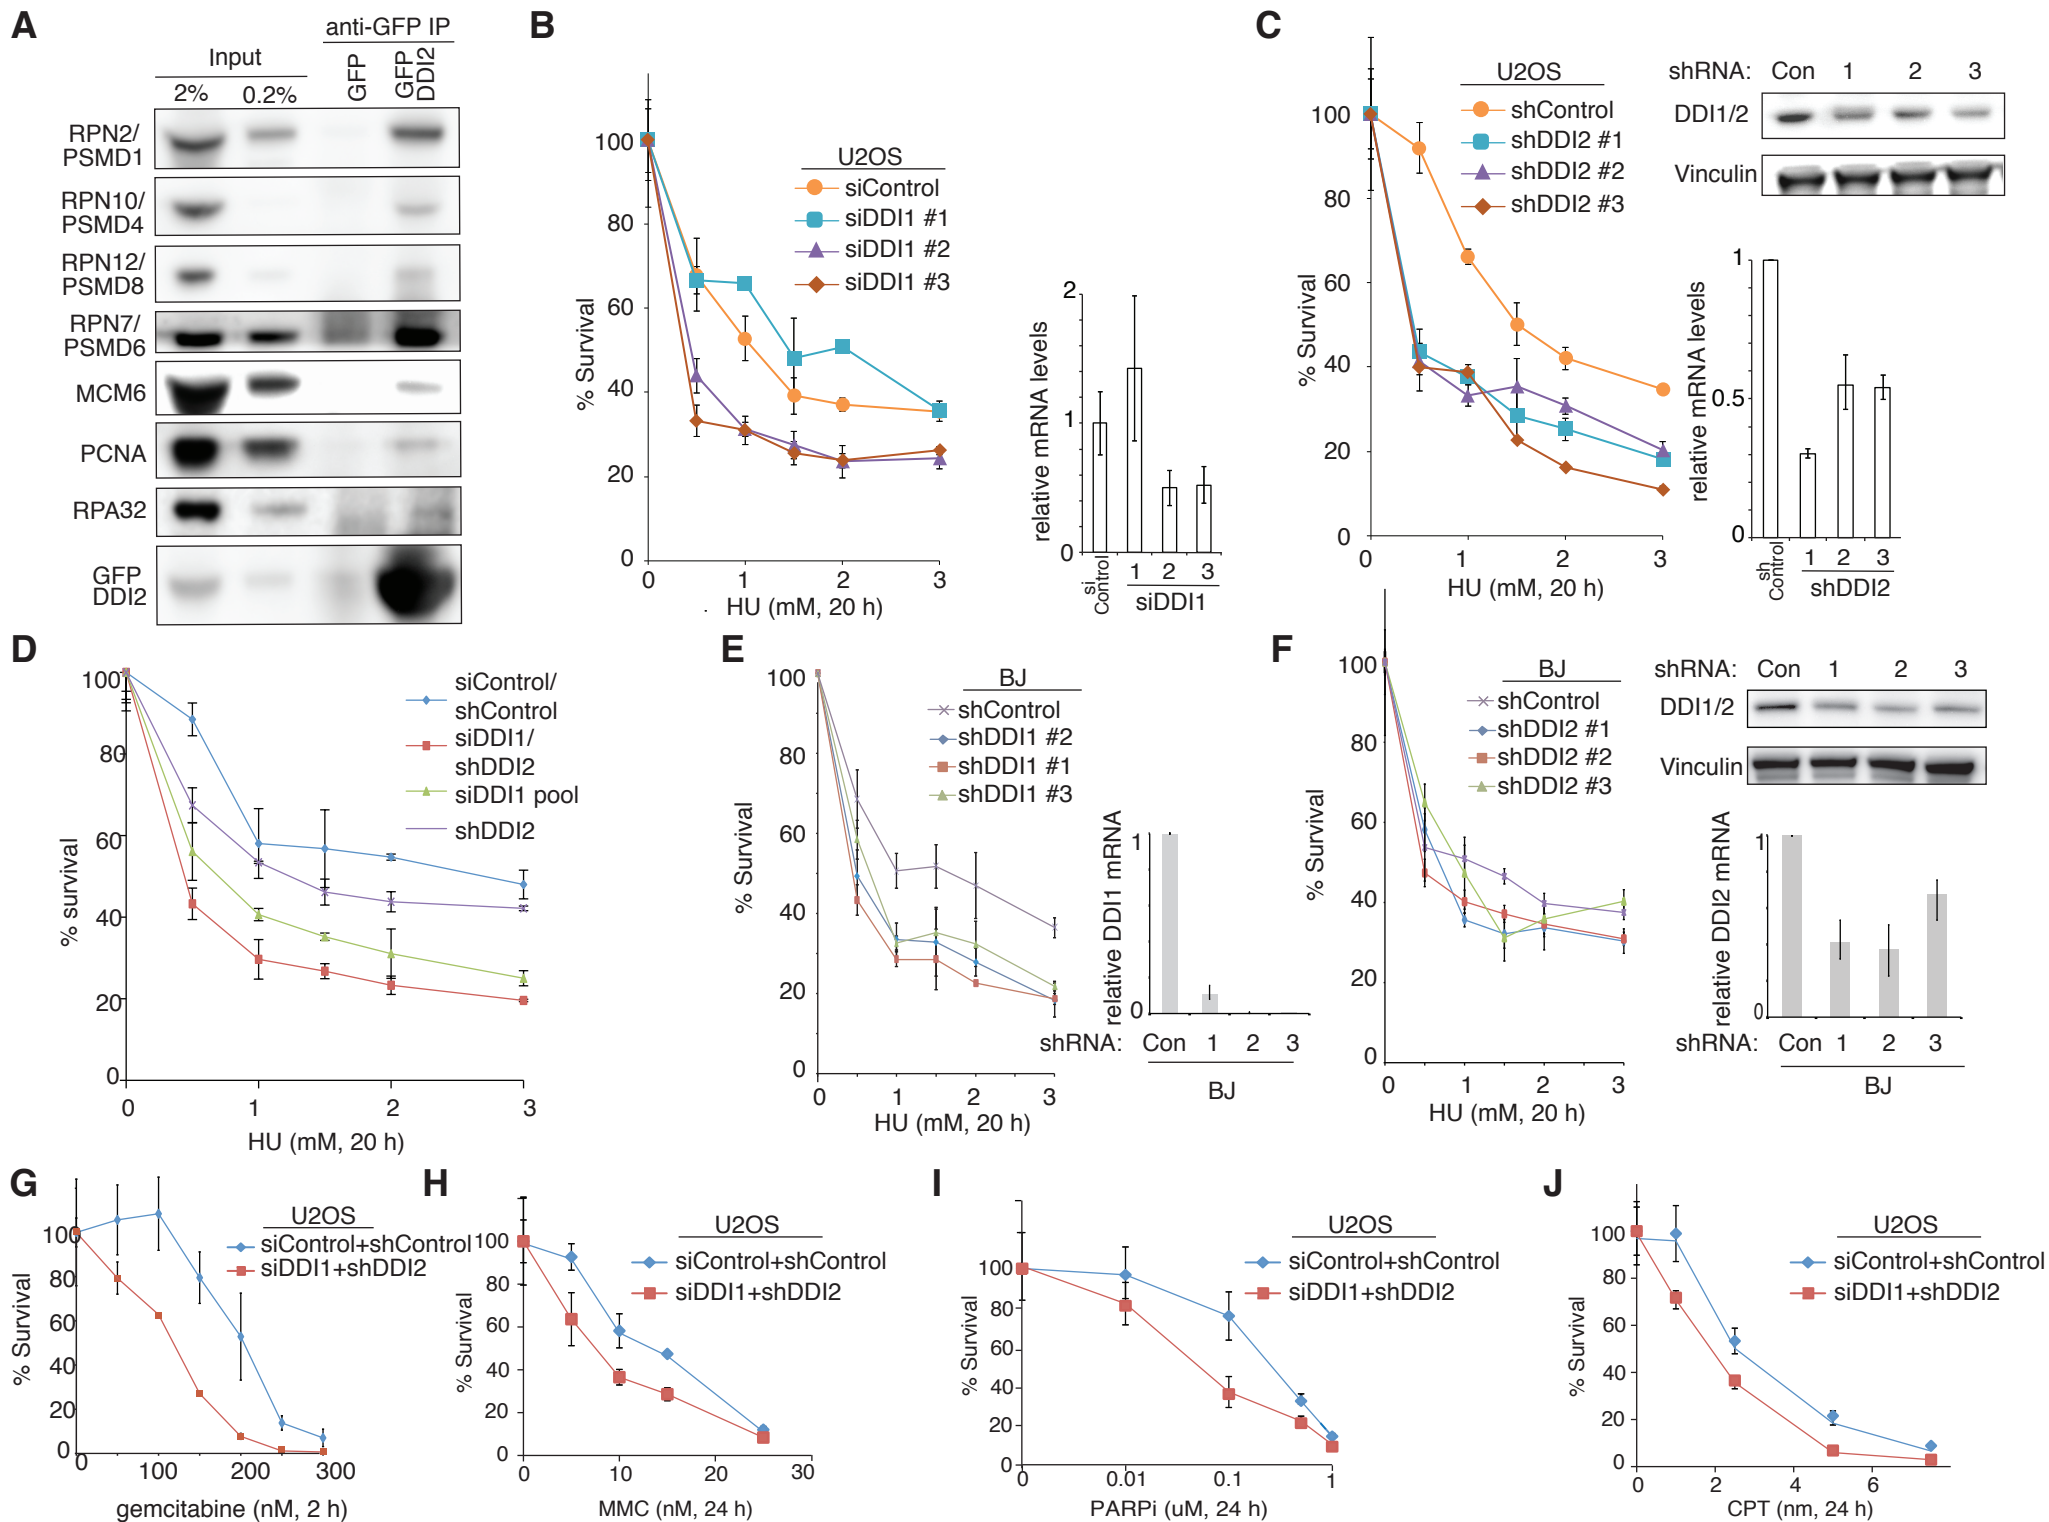

**Figure S1: DDI1/2 depletion leads to decreased cellular survival after replication stress, related to Figure 1**

(A) Validation of a subset of interactions identified by mass spectrometry by western blot following IP of GFP-tagged DDI2. (B) Graphs showing survival of U2OS cells transiently transfected with 3 independent siRNAs against DDI1 or luciferase control. Cells were treated with the indicated doses of HU for 20 h, washed, released, allowed to grow for 7 days, and counted. Relative DDI1 mRNA levels are shown. (C) Graphs showing survival of U2OS cells stably expressing 3 independent shRNAs against DDI2 or luciferase control. Cells were treated as above. Western blot and relative DDI2 mRNA levels are shown. (D) Graph showing relative survival of U2OS cells treated with shDDI2, siDDI1, or a combination of the two, following treatment with indicated doses of HU for 20 h. (E) Graphs showing survival of BJ cells transduced with 3 independent shRNAs against DDI1 or luciferase control. Cells were treated with the indicated doses of HU for 20 h, washed, released, allowed to grow for 7 days, and counted. (F) Graphs showing survival of BJ cells stably expressing 3 independent shRNAs against DDI2 or luciferase control. Cells were treated as above. Western blot and relative DDI2 mRNA levels are shown. (G-J) Graphs showing survival of U2OS cells transiently transfected with a pool of siRNAs against DDI1 or control and stably expressing shDDI2 #1 or control following 2 h treatment with indicated doses of gemcitabine (G) or 24 hrs of MMC (H), PARP inhibitor olaparib (I), or camptothecin (J). Cells were counted 7 days after treatment.

Figure S2

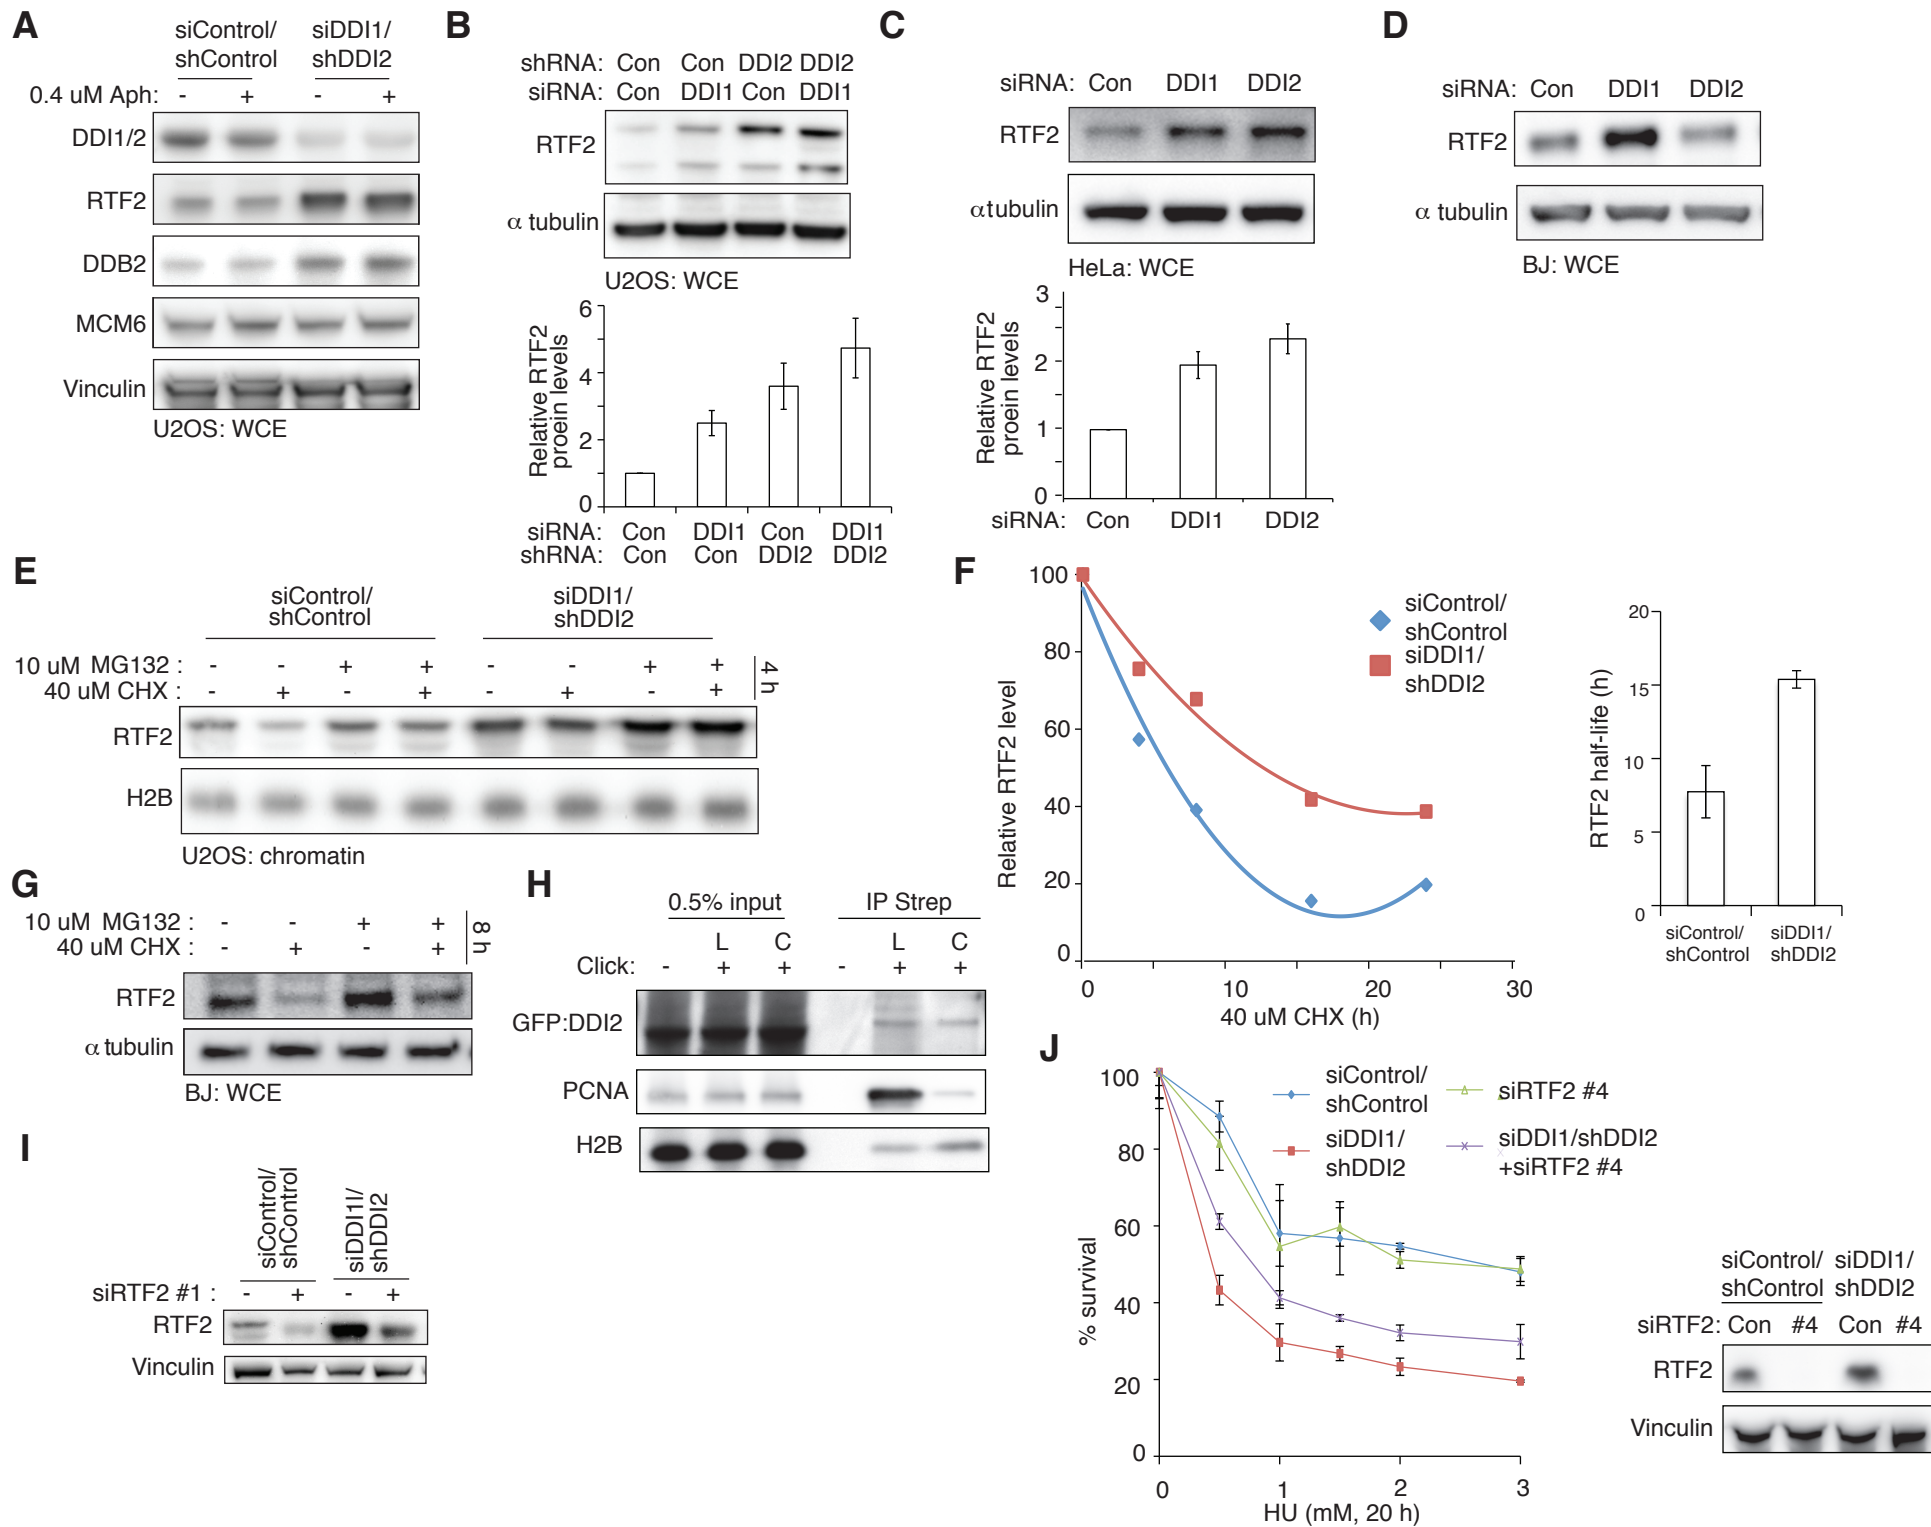

**Figure S2: DDI1/2 depletion results in RTF2 stabilization; related to Figure 2**

(A) Western blot showing stabilization of RTF2 and DDB2 in whole cell lysates from U2OS cells following depletion of DDI1/2. (B) Western blot and quantification showing stabilization of RTF2 in U2OS cells by depletion of DDI1 alone, DDI2 alone, or both. Error bars represent SEM n=3. (C) Western blot and quantification showing RTF2 levels in HeLa cells following depletion of DDI1 or DDI2. Error bars represent SEM n=3. (D) Western blot showing RTF2 levels in BJ fibroblasts following depletion of DDI1 or DDI2. (E) Western blot showing stabilization of RTF2 on chromatin from U2OS cells following knockdown of DDI1+2 and/or treatment with proteasome inhibitor. Cells were exposed to 4 h of cycloheximide, MG-132, or a combination of the two drugs. (F) Graphs showing half-life of RTF2 in the presence of cycloheximide in control cells compared to DDI1/2 depletion. Error bars represent SEM n=at least 3. (G) Western blot showing stabilization of RTF2 in whole cell lysates from BJ cells following treatment by proteasome inhibitor. Cells were exposed to 8 h of cycloheximide, MG-132, or a combination of the two drugs. (H) Western blot showing iPOND analysis of H2B, PCNA, and GFP:DDI2 presence on chromatin following 10' EdU label (L) or 10' EdU label followed by 50' thymidine chase (C). (I) Western blot showing RTF2 levels in cells used in sensitivity assay shown in Figure 2H. (J) Graph showing relative survival of U2OS cells treated with shDDI2 and siDDI1 or control plus or minus siRNA knockdown of RTF2 with si #4. Cells were exposed to indicated doses of HU for 20 h. Western blot showing RTF2 level in these cells.

Figure S3

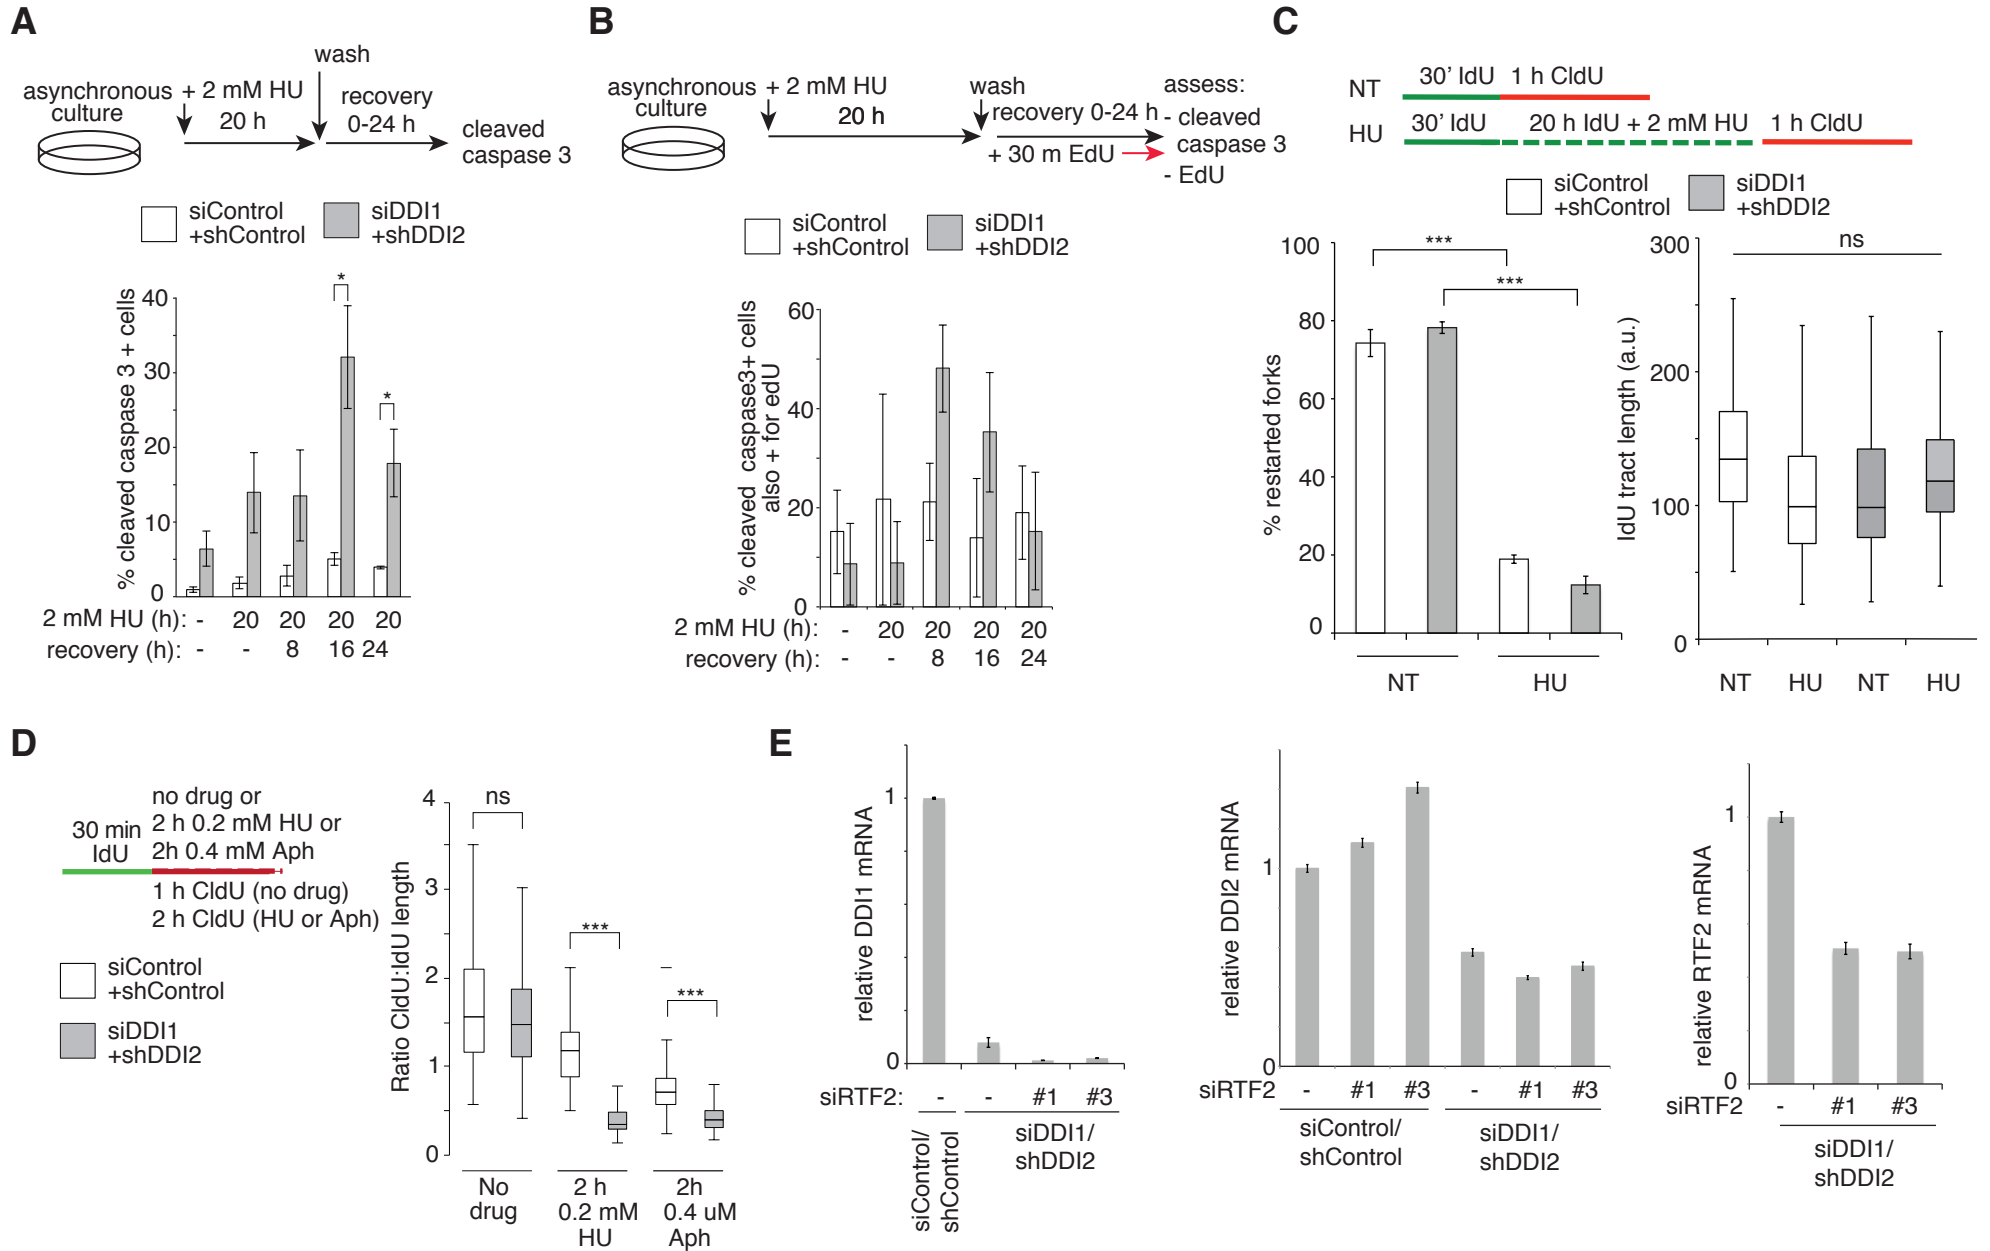

**Figure S3: Response to replication stress is altered in cells depleted of DDI1/2; related to Figure 3**

**(A)** Analysis of the percentage of apoptotic cells as determined by cleaved caspase-3 staining in control or DDI1/2 depleted cells following synchronization by 20h 2mM HU treatment and release. **(B)** Analysis of the percentage of cleaved caspase 3-positive cells that are also positive for EdU incorporation. Error bars represent SEM n=3. **(C)** Schematic of experimental setup in which cells were exposed to consecutive pulses of IdU and CldU +/- 20 h of 2 mM HU coincubated with IdU. Graph showing the percent of restarted forks (IdU:CldU jointly labeled/[IdU:CldU jointly labeled + only IdU labeled]) under these conditions. Graph showing total IdU tract length after 30' or 30' + 20h HU + IdU. **(D)** Analysis of fork processivity defined by the ratio of CldU to IdU label length of continuing forks measured using fibers from control or DDI1/2 depleted cells subjected to the indicated drug treatment during CldU labeling. **(E)** Relative DDI1 and DDI2 mRNA levels with and without concurrent knockdown of RTF2.

Figure S4

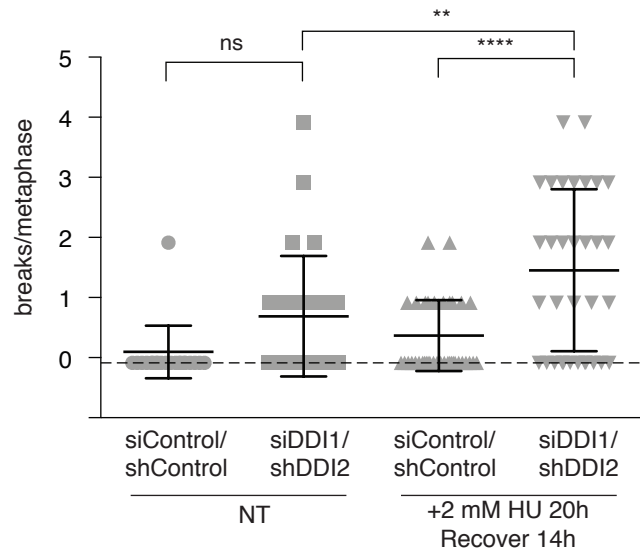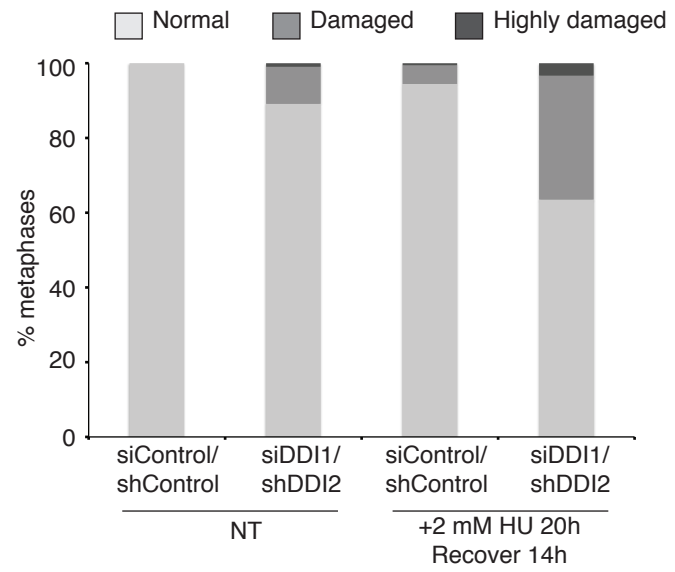



**Figure S4: DDI1/2 depletion leads to increased chromosomal damage after acute replication stress, related to Figure 4**

Quantification of the number of breaks per countable metaphase, and the proportion of metaphases classified as normal, damaged, or highly damaged, in control or DDI1/2 depleted cells that were exposed to 20 h 2 mM HU and released for 14 h in the presence of the apoptosis inhibitor zVAD-FMK.

Figure S5

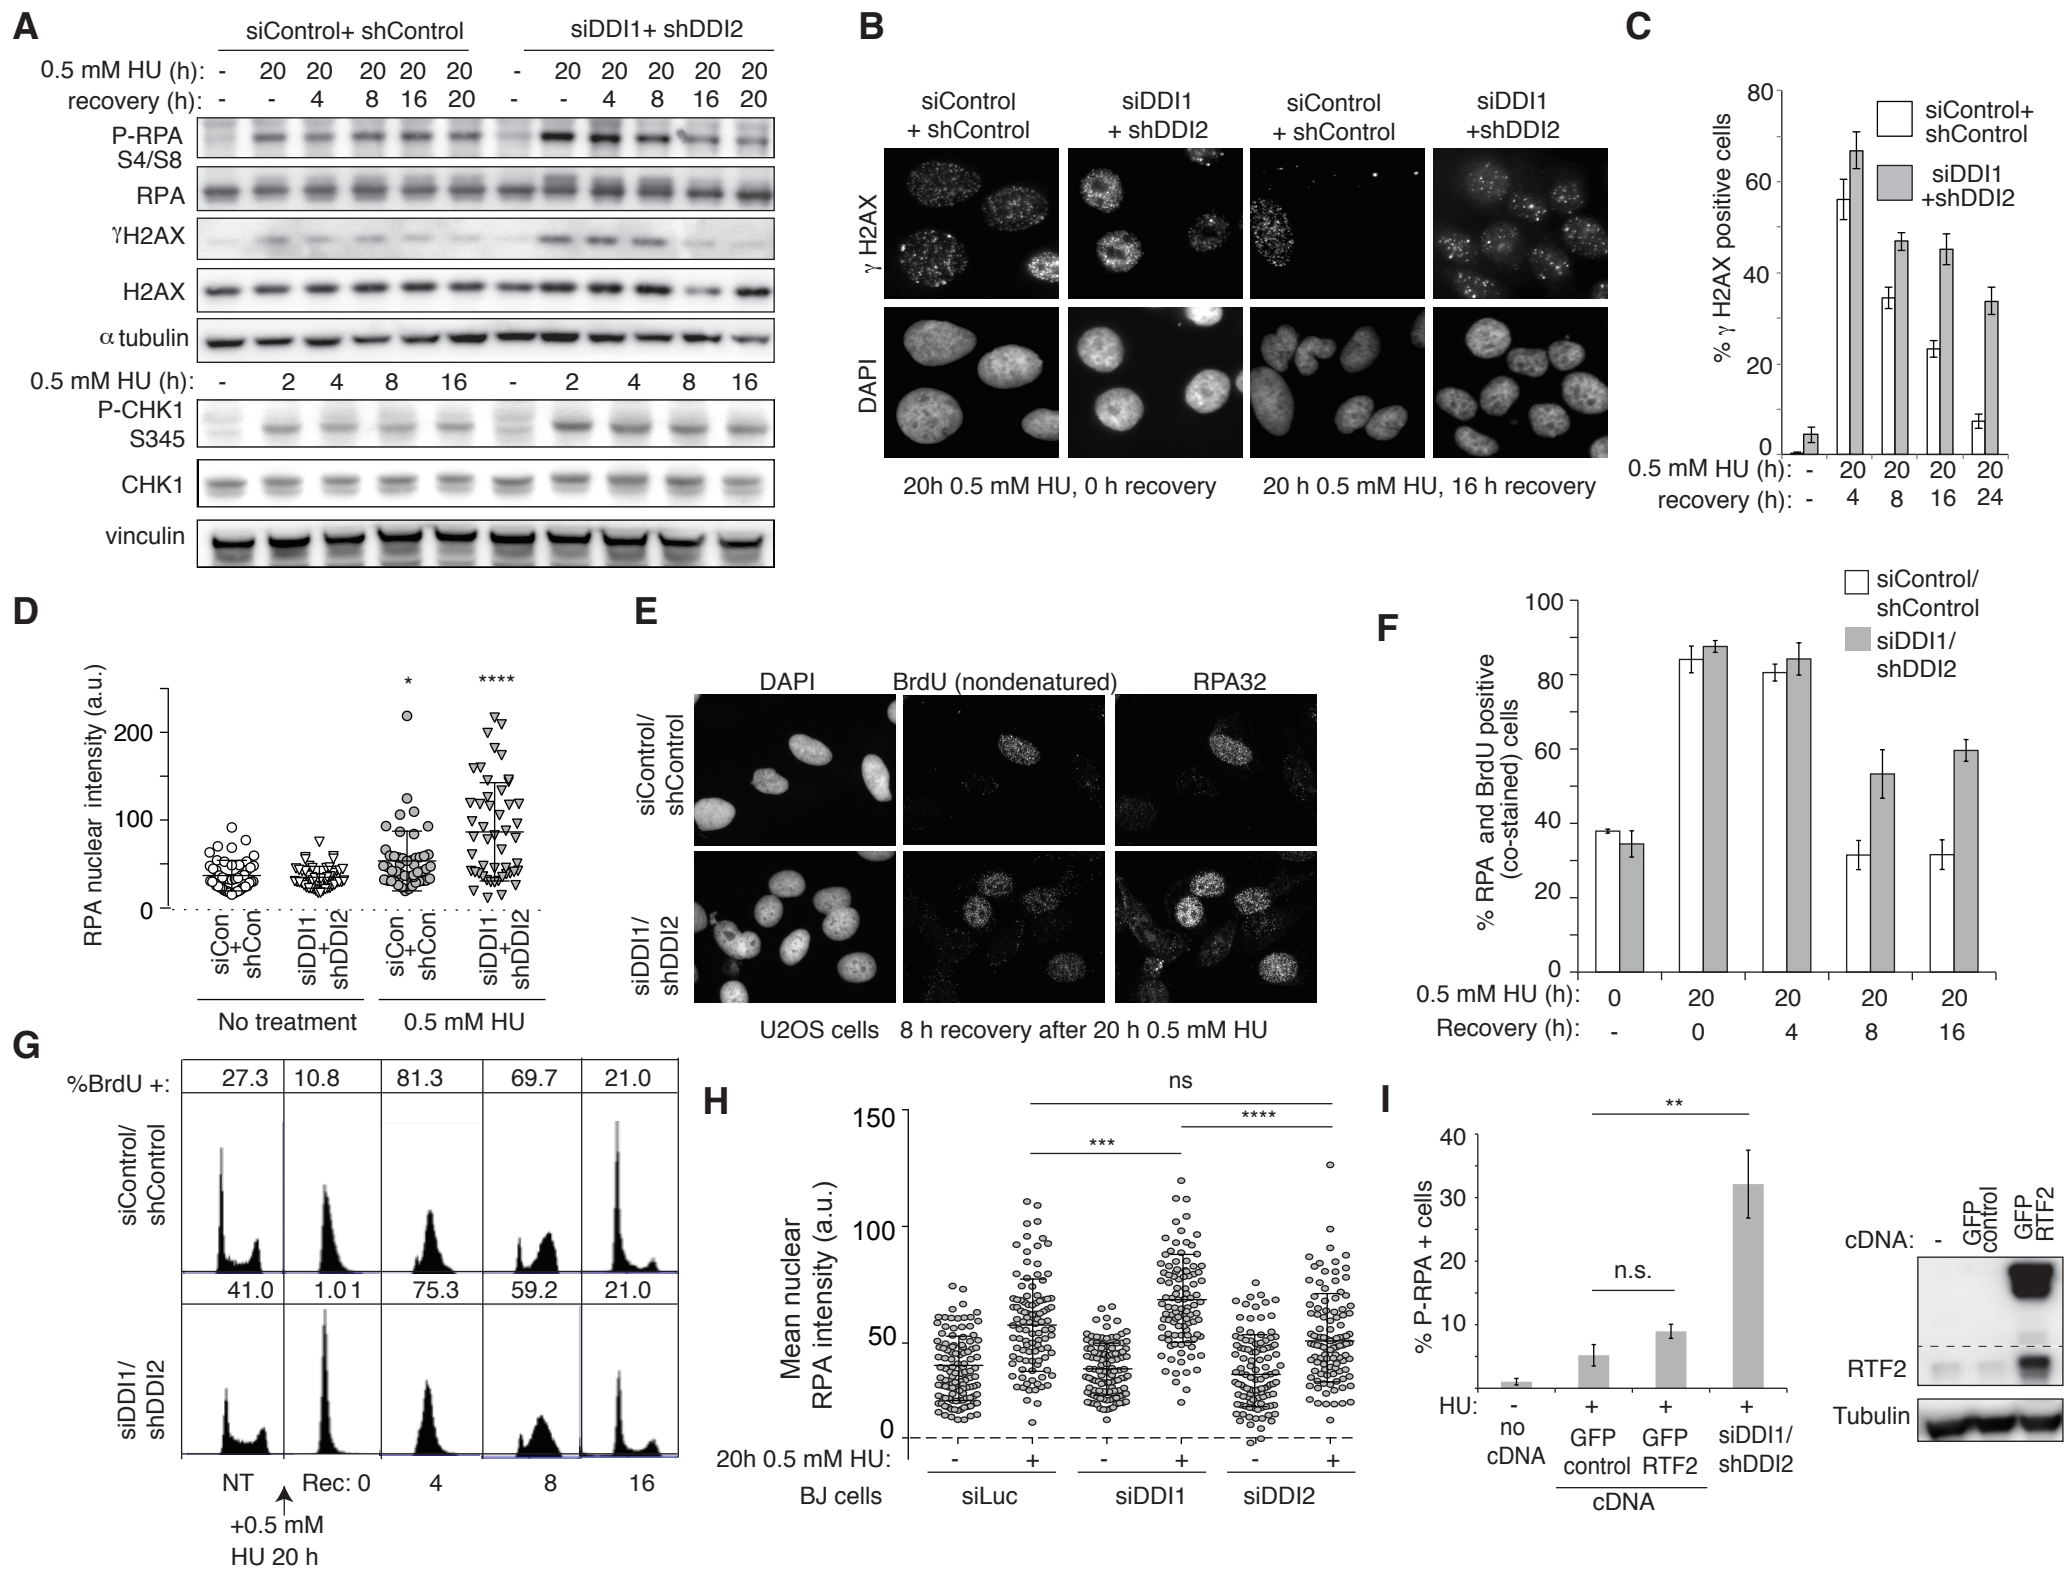

**Figure S5: Heightened DNA damage signaling and ssDNA during replication stress under conditions of DDI1/2 depletion, related to Figure 5**

(A) Immunoblot analysis of whole cell extract to assess phosphorylated RPA32 and  $\gamma$ H2AX levels. Control or DDI1/2 depleted cells were treated with 0.5 mM HU for 20 h, released, and allowed to recover for indicated duration. (B) Representative immunofluorescence images of  $\gamma$ H2AX foci in control or DDI1/2 depleted cells following release from 20 h treatment with 0.5 mM HU. (C) Quantification of  $\gamma$ H2AX-positive cells at the indicated timepoints following release from 20h treatment with 0.5 mM HU. (D) Quantification of mean nuclear intensity of chromatin-bound RPA staining in control or DDI1/2 depleted cells treated with 0.5 mM HU for 20 h and extracted with 0.25% Triton-X. (E) Representative image of ssDNA in U2OS cells 8 hours after release from 20h treatment with 0.5 mM HU as assessed by immunofluorescence imaging of RPA or staining of BrdU signal performed under non-denaturing conditions. (F) Quantification of ssDNA accumulation and persistence in U2OS following 20 h treatment with 0.5 mM HU and release for the indicated duration. Cells with at least 5 RPA and BrdU positive foci were counted as positive. Error bars represent SEM n=3. (G) Analysis of cell cycle progression in U2OS cells exposed to 20 h 0.5 mM HU and released for the indicated length of time. (H) Quantification of mean nuclear RPA intensity of Triton extracted BJ fibroblasts following 20 h treatment with 0.5 mM HU and no release. (I) Graph showing % of phospho-RPA cells by immunofluorescence in cells expressing GFP control, overexpressed GFP:RTF2, or with DDI1/2 knockdown. Only cells visibly expressing GFP:RTF2 were counted. Western blot showing level of overexpressed RTF2.

Figure S6

**A**

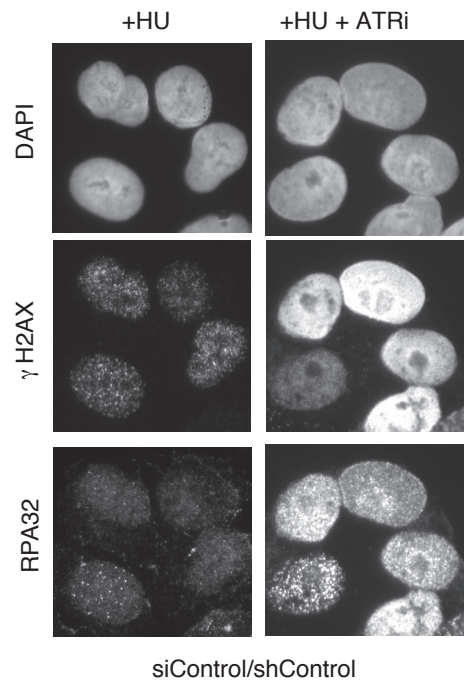

**B**

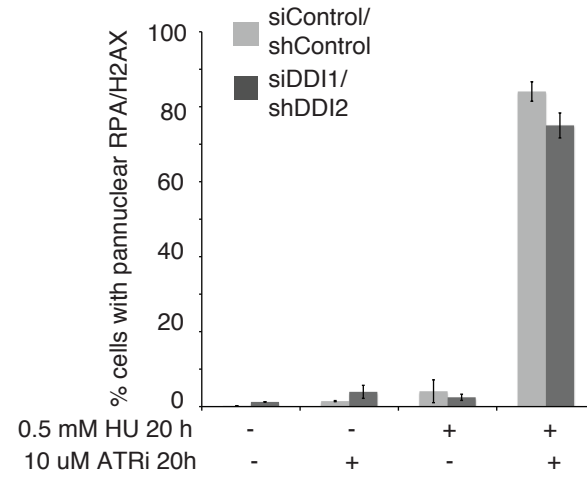

**C**

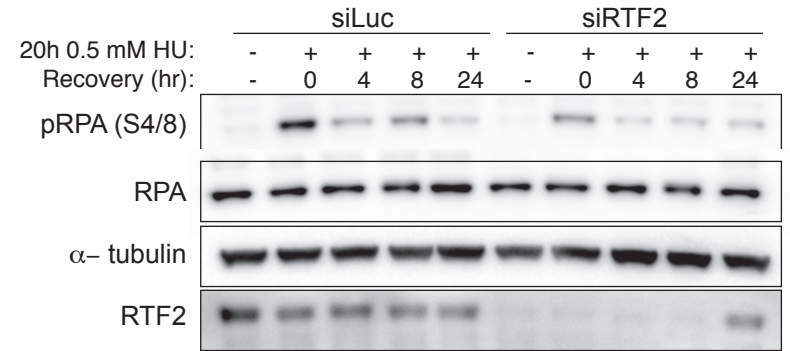

**D**

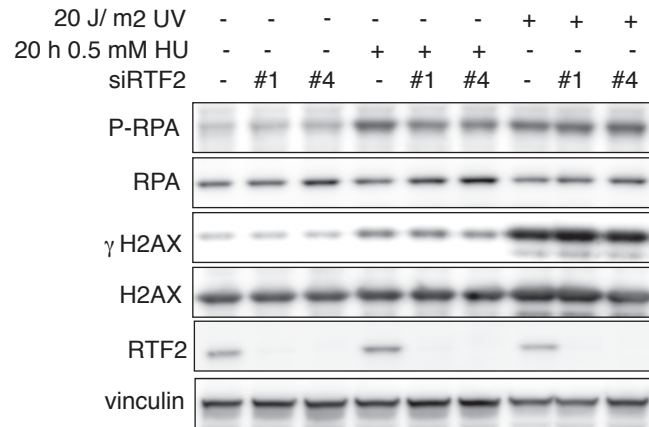

**E**

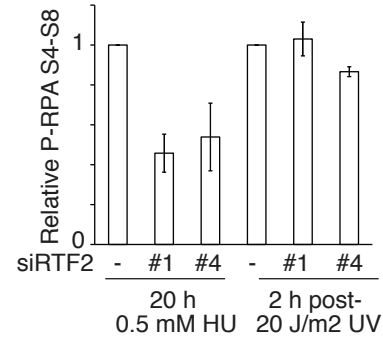

**Figure S6: RTF2 is required for robust RPA phosphorylation in response to replication stress induced by HU; related to Figure 5**

(A) Representative immunofluorescence images of focal and pancellular  $\gamma$ H2AX staining in U2OS cells following treatment with 20h 0.5 mM HU +/- the ATR inhibitor VE-821. (B) Quantification of U2OS cells with pancellular  $\gamma$ H2AX and RPA staining following treatment with 20h 0.5 mM HU +/- the ATR inhibitor VE-821. Error bars represent SEM n=3. (C) Analysis of DNA damage signaling and ssDNA by western blotting whole cell extracts from BJ fibroblasts with antibodies against phosphorylated RPA (S4/S8). Cells treated with siControl and siRTF2 #1 were treated with 20 h 0.5 mM HU and allowed to recover for the indicated times. (D) Analysis of DNA damage signaling and ssDNA by western blotting with antibodies against phospho-RPA. Cells treated with siControl, siRTF2 #1, and siRTF2 #4 were treated with 20 h 0.5 mM HU or 20 J/m<sup>2</sup> UV (2 h post-irradiation). (E) Quantification of phosphorylated-RPA levels relative to total RPA. Error bars represent SEM n=3. \*p<0.05 \*\*p<0.01 \*\*\*p<0.001 \*\*\*\*p<0.0001 by ANOVA.

**Supplemental Table 1: RNAi and primer sequences, related to STAR Methods Cell culture, transfection and viral transduction; and RNA preparation, reverse transcription, and real time PCR.**

|                                        |                       |                           |
|----------------------------------------|-----------------------|---------------------------|
| RNAi materials                         |                       |                           |
| DDI1 siRNA 1 ccggagacaucauguuccaucgat  | Invitrogen            | HSS181016                 |
| DDI1 siRNA 2 ggaaauuacacauucagucauggat | Invitrogen            | HSS140552                 |
| DDI1 siRNA 3 ccuacggccucaaagauggcgauat | Invitrogen            | HSS140553                 |
| DDI2 siRNA 1 gaatagauuucaguaguauatt    | Ambion                | s38861                    |
| DDI2 siRNA 2 gcaaagauagaagaagauatt     | Ambion                | s38862                    |
| DDI2 siRNA 3 gcagaaagguguaacauaatt     | Ambion                | s38863                    |
| DDI2 shRNA 1 uggaaucgauacagcuca        | Open Biosystems       | V3LHS_328065              |
| DDI2 shRNA 2 aggcagaauGCCAauguca       | Open Biosystems       | V3LHS_32806               |
| DDI2 shRNA 3 aguaugagguugcacaaca       | Open Biosystems       | V3LHS_328069              |
| MRE11 siRNA 1 gauagacauuaguccguutt     | Ambion                | s8959                     |
| MRE11 siRNA 2 cccgaaaugucacuacuaatt    | Ambion                | s8960                     |
| MRE11 siRNA 3 cgacugcgaguggacuauatt    | Ambion                | s8961                     |
| BRCA2 siRNA 1 uacguuuuuaggugaagcctg    | Ambion                | s224695                   |
| BRCA2 siRNA 2 uuccguuuuuuacaacugta     | Ambion                | s2083                     |
| BRCA2 siRNA 3 uugcgaaauauguauaaucua    | Ambion                | s2084                     |
| RTF2 siRNA 1 gaagaaggucgagaagguugacaaa | Invitrogen            | MSS227432                 |
| RTF2 siRNA 2 ucaaagccggguaccacacaagatt | Invitrogen            | MSS227433                 |
| RTF2 siRNA 3 gcccaauggaacuacuguaccuuaa | Invitrogen            | MSS227434                 |
| RTF2 siRNA 4 caaagaugccgucauugaatt     | Invitrogen            | s226737                   |
| qPCR primer sequences                  |                       |                           |
| Gene                                   | Forward Sequence      | Reverse Sequence          |
| Beta-Actin                             | gctacgagctgctgacg     | ggctggaagagtgcctca        |
| DDI1                                   | tggaacacaacgtgctacct  | atctgtctgggggtgtct        |
| DDI2                                   | tcgatgtagtgtgtgtactgc | ccagtgaggtagattcttaccactt |
| RTF2                                   | tgctgaagacaaggatggag  | tgaacagactctgctgcct       |
